# Supplementary material for: Slt2-MAPK/RNS1 Controls Conidiation via Direct Regulation of the Central Regulatory Pathway in the Fungus Metarhizium robertsii
Source: MDPI journal article supplement (doi:10.3390/jof8010026), 2021-12-28
Supplement: s1 [file s1]

**Table S1.** Primers used in this study

| Primer name              | Sequence                                               | Usage                                                            |
|--------------------------|--------------------------------------------------------|------------------------------------------------------------------|
| Slt2-myc-5               | GGATCCATGGCCGATCTCCAGGGA                               | Cloning the CDS of Slt2 to construct Slt2::Myc                   |
| Slt2-myc-3               | GATATCTTACCTCCTAGATGCATCCA                             |                                                                  |
| pGBKT7-Slt2-5            | GGGAATTCATGGCCGATCTCCAGGG                              | Cloning the CDS of Slt2 for Yeast two-hybrid                     |
| pGBKT7-Slt2-3            | GGGGATCCTTACCTCCTAGATGCAT                              |                                                                  |
| BrlA-ChIP-5              | AGTTGCCAGGCTCCAAGCTG                                   | ChIP-qPCR analysis of <i>BrlA</i>                                |
| BrlA-ChIP-3              | ATATGGAAGATGGGATGGGAC                                  |                                                                  |
| AbaA-ChIP-5              | TTGGTGTGCTGGACCCGCTCA                                  | ChIP-qPCR analysis of <i>AbaA</i>                                |
| AbaA-ChIP-3              | TCAAGATCTATCTACACAGC                                   |                                                                  |
| 5'RACE-F                 | AAGCTTGGCGTAATCCATCTCGAGCATGTG<br>GTCGTAGT             | 5'RACE analysis of <i>BrlA</i>                                   |
| 3'RACE-F                 | GATTACGCCAAGCTTCACACAGCCTATCCG<br>GATCCGAG             | 3'RACE analysis of <i>BrlA</i>                                   |
| EMSA-BrlA- <i>BM2</i> -F | CTCGACTCTTGACTCTCTCGACCAGACTCT<br>TGACTCTTGACGCTCGACT  | Bio-labeled/unlabeled probes for EMSA analysis                   |
| EMSA-BrlA- <i>BM2</i> -R | AGTCGAGCGTCAAGAGTCAAGAGTCTGGT<br>CGAGAGAGTCAAGAGTCGAG  |                                                                  |
| EMSA-AbaA- <i>BM2</i> -F | TGCCCCGTTGGGTTTTACGACAAGACCTTC<br>ATTGGCCGGAGCTCTCGTCT | Bio-labeled/unlabeled probes for EMSA analysis                   |
| EMSA-AbaA- <i>BM2</i> -R | AGACGAGAGCTCCGGCCAATGAAGGTCTT<br>GTCGTAAAACCCAACGGGCA  |                                                                  |
| RNS1-S306A-mutant-F      | CAGAGGAAACGCTCCCTACATGGACACGC<br>AGCG                  | Substituting the Ser-306 to alanine in RNS1 protein.             |
| RNS1-S306A-mutant-R      | GAGGCGTACCTGTGCCCC                                     |                                                                  |
| BrlA-RT-F-1              | CGACTACCATCGAGATT                                      | RT-PCR analysis for <i>BrlA</i> $\alpha$ and <i>BrlA</i> $\beta$ |
| BrlA-RT-R-1              | CGAAAAGAGGACGGACG                                      |                                                                  |
| BrlA-RT-F-2              | CACACAGCCTATCCGGATCC                                   |                                                                  |
| BrlA-RT-R-2              | ATCATTTTTTCGATGGGCGCG                                  |                                                                  |
| AbaA-RT-F                | CATTCTTAGCATGGCGGTGC                                   | RT-PCR analysis of <i>AbaA</i>                                   |
| AbaA-RT-R                | TGCTACCAGCTCTCTCGAGT                                   |                                                                  |
| WetA-RT-F                | CGAAATAGGAAAGCAGCCGC                                   | RT-PCR analysis of <i>WetA</i>                                   |
| WetA-RT-R                | GTCATCACACTGCCCATGGA                                   |                                                                  |
| RNS1-RT-5                | CCGACATCAAGCAGGACATG                                   | RT-PCR analysis of RNS1                                          |
| RNS1-RT-3                | CTTGTTCTTGATGCCTCGGG                                   |                                                                  |

|          |                      |                                        |
|----------|----------------------|----------------------------------------|
| Act-RT-F | TCCTGACGGTCAGGTCATC  | Reference gene for qRT-PCR<br>analysis |
| Act-RT-R | CACCAGACATGACGATGTTG |                                        |
| Tef-RT-F | CTGGTACAAGGGTTGGGAGA | Reference gene for qRT-PCR<br>analysis |
| Tef-RT-R | TACACATCCTGGAGGGGAAG |                                        |

---

**Table S2.** Relative germination inhibition of the WT strain, the mutant *ΔRnsI* and the complemented strain *C-ΔRnsI* under the four abiotic stresses.

| Strains               | UV radiation           | Hyperosmotic           | Oxidative stress       | Congo red              |
|-----------------------|------------------------|------------------------|------------------------|------------------------|
| <b>WT</b>             | 0.18±0.07 <sup>a</sup> | 0.38±0.02 <sup>a</sup> | 0.04±0.01 <sup>a</sup> | 0.33±0.01 <sup>a</sup> |
| <b><i>ΔRnsI</i></b>   | 0.14±0.05 <sup>a</sup> | 0.34±0.05 <sup>a</sup> | 0.07±0.03 <sup>a</sup> | 0.25±0.04 <sup>a</sup> |
| <b><i>C-ΔRnsI</i></b> | 0.25±0.05 <sup>a</sup> | 0.35±0.03 <sup>a</sup> | 0.06±0.05 <sup>a</sup> | 0.31±0.03 <sup>a</sup> |

Note: within each column, different letters represent significant difference ( $P < 0.05$ , Tukey's test One-way ANOVA).
